# Supplementary material for: Chiral Trapped Headspace GC-QMS-IMS: Boosting Untargeted Benchtop Volatilomics to the Next Level
Source: Preprints.org preprint supplement (doi:10.20944/preprints202407.1331.v1), 2024-07-16
Supplement: Supplementary file 1 [file supplementary]

Supplementary Materials

Chiral trapped headspace GC-QMS-IMS: boosting untargeted benchtop volatilomics to the next level

Lukas Bodenbender 1,2, Sascha Rohn 2, Simeon Sauer 3, Markus Jungen 4 and Philipp Weller 1, *

1 Institute for Instrumental Analytics and Bioanalytics, Mannheim University of Applied Sciences, Paul-Wittsack-Str. 10,68163 Mannheim, l.bodenbender@hs-mannheim.de (L.B.); p.weller@hs-mannheim.de (P.W.)

2 Department of Food Chemistry and Analysis, Institute of Food Technology and Food Chemistry, Technische Universität Berlin, Gustav-Meyer-Allee 25, 13355 Berlin; rohn@tu-berlin.de (S.R.)

3 Faculty of Biotechnology, Mannheim University of Applied Sciences, Paul-Wittsack-Str. 10, 68163 Mannheim; s.sauer@hs-mannheim.de (S.S.)

4 SGF International e.V., Marie-Curie-Ring 10a, 55291 Saulheim, Germany; markus@sgf.org (M.J.)

***** Correspondence: p.weller@hs-mannheim.de; Tel.: +49-(0)621-292-6484

**
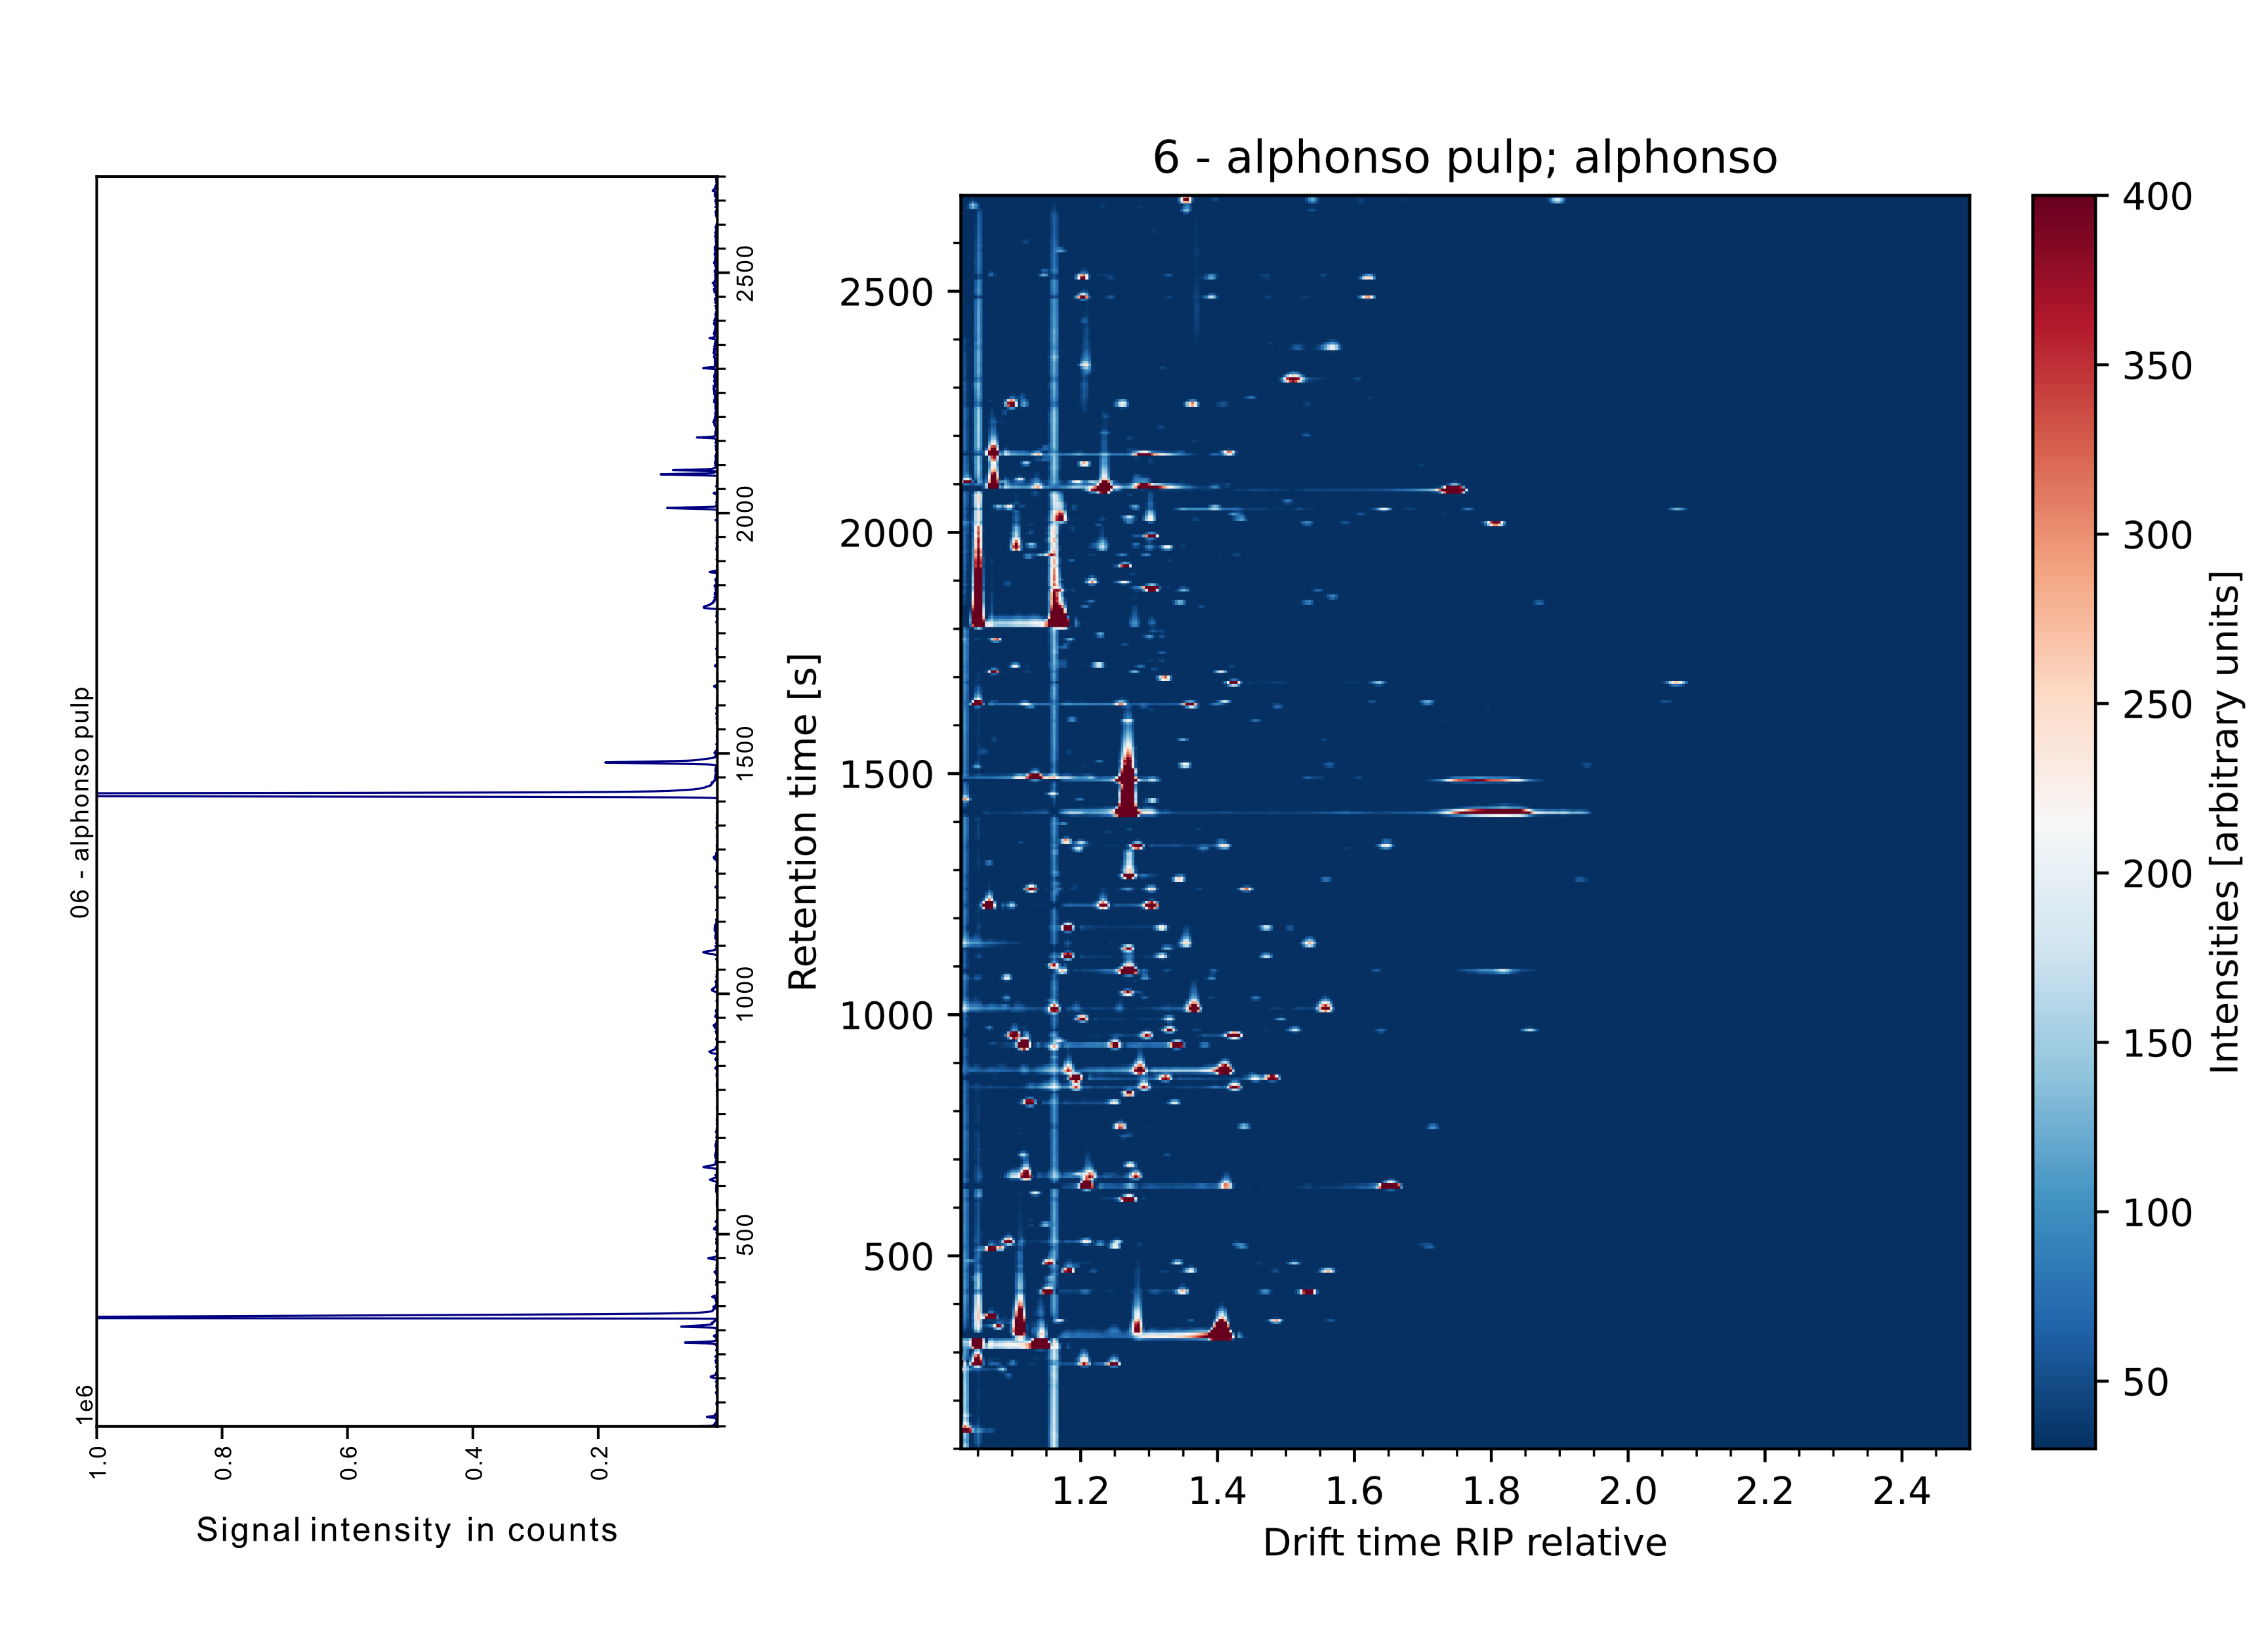
**

**(a) (b)**

**Figure S1.** Exemplaryvisualization of a ‘Alphonso´ mango sample and the simultaneous sample data of MS (**a**) and IMS (

**
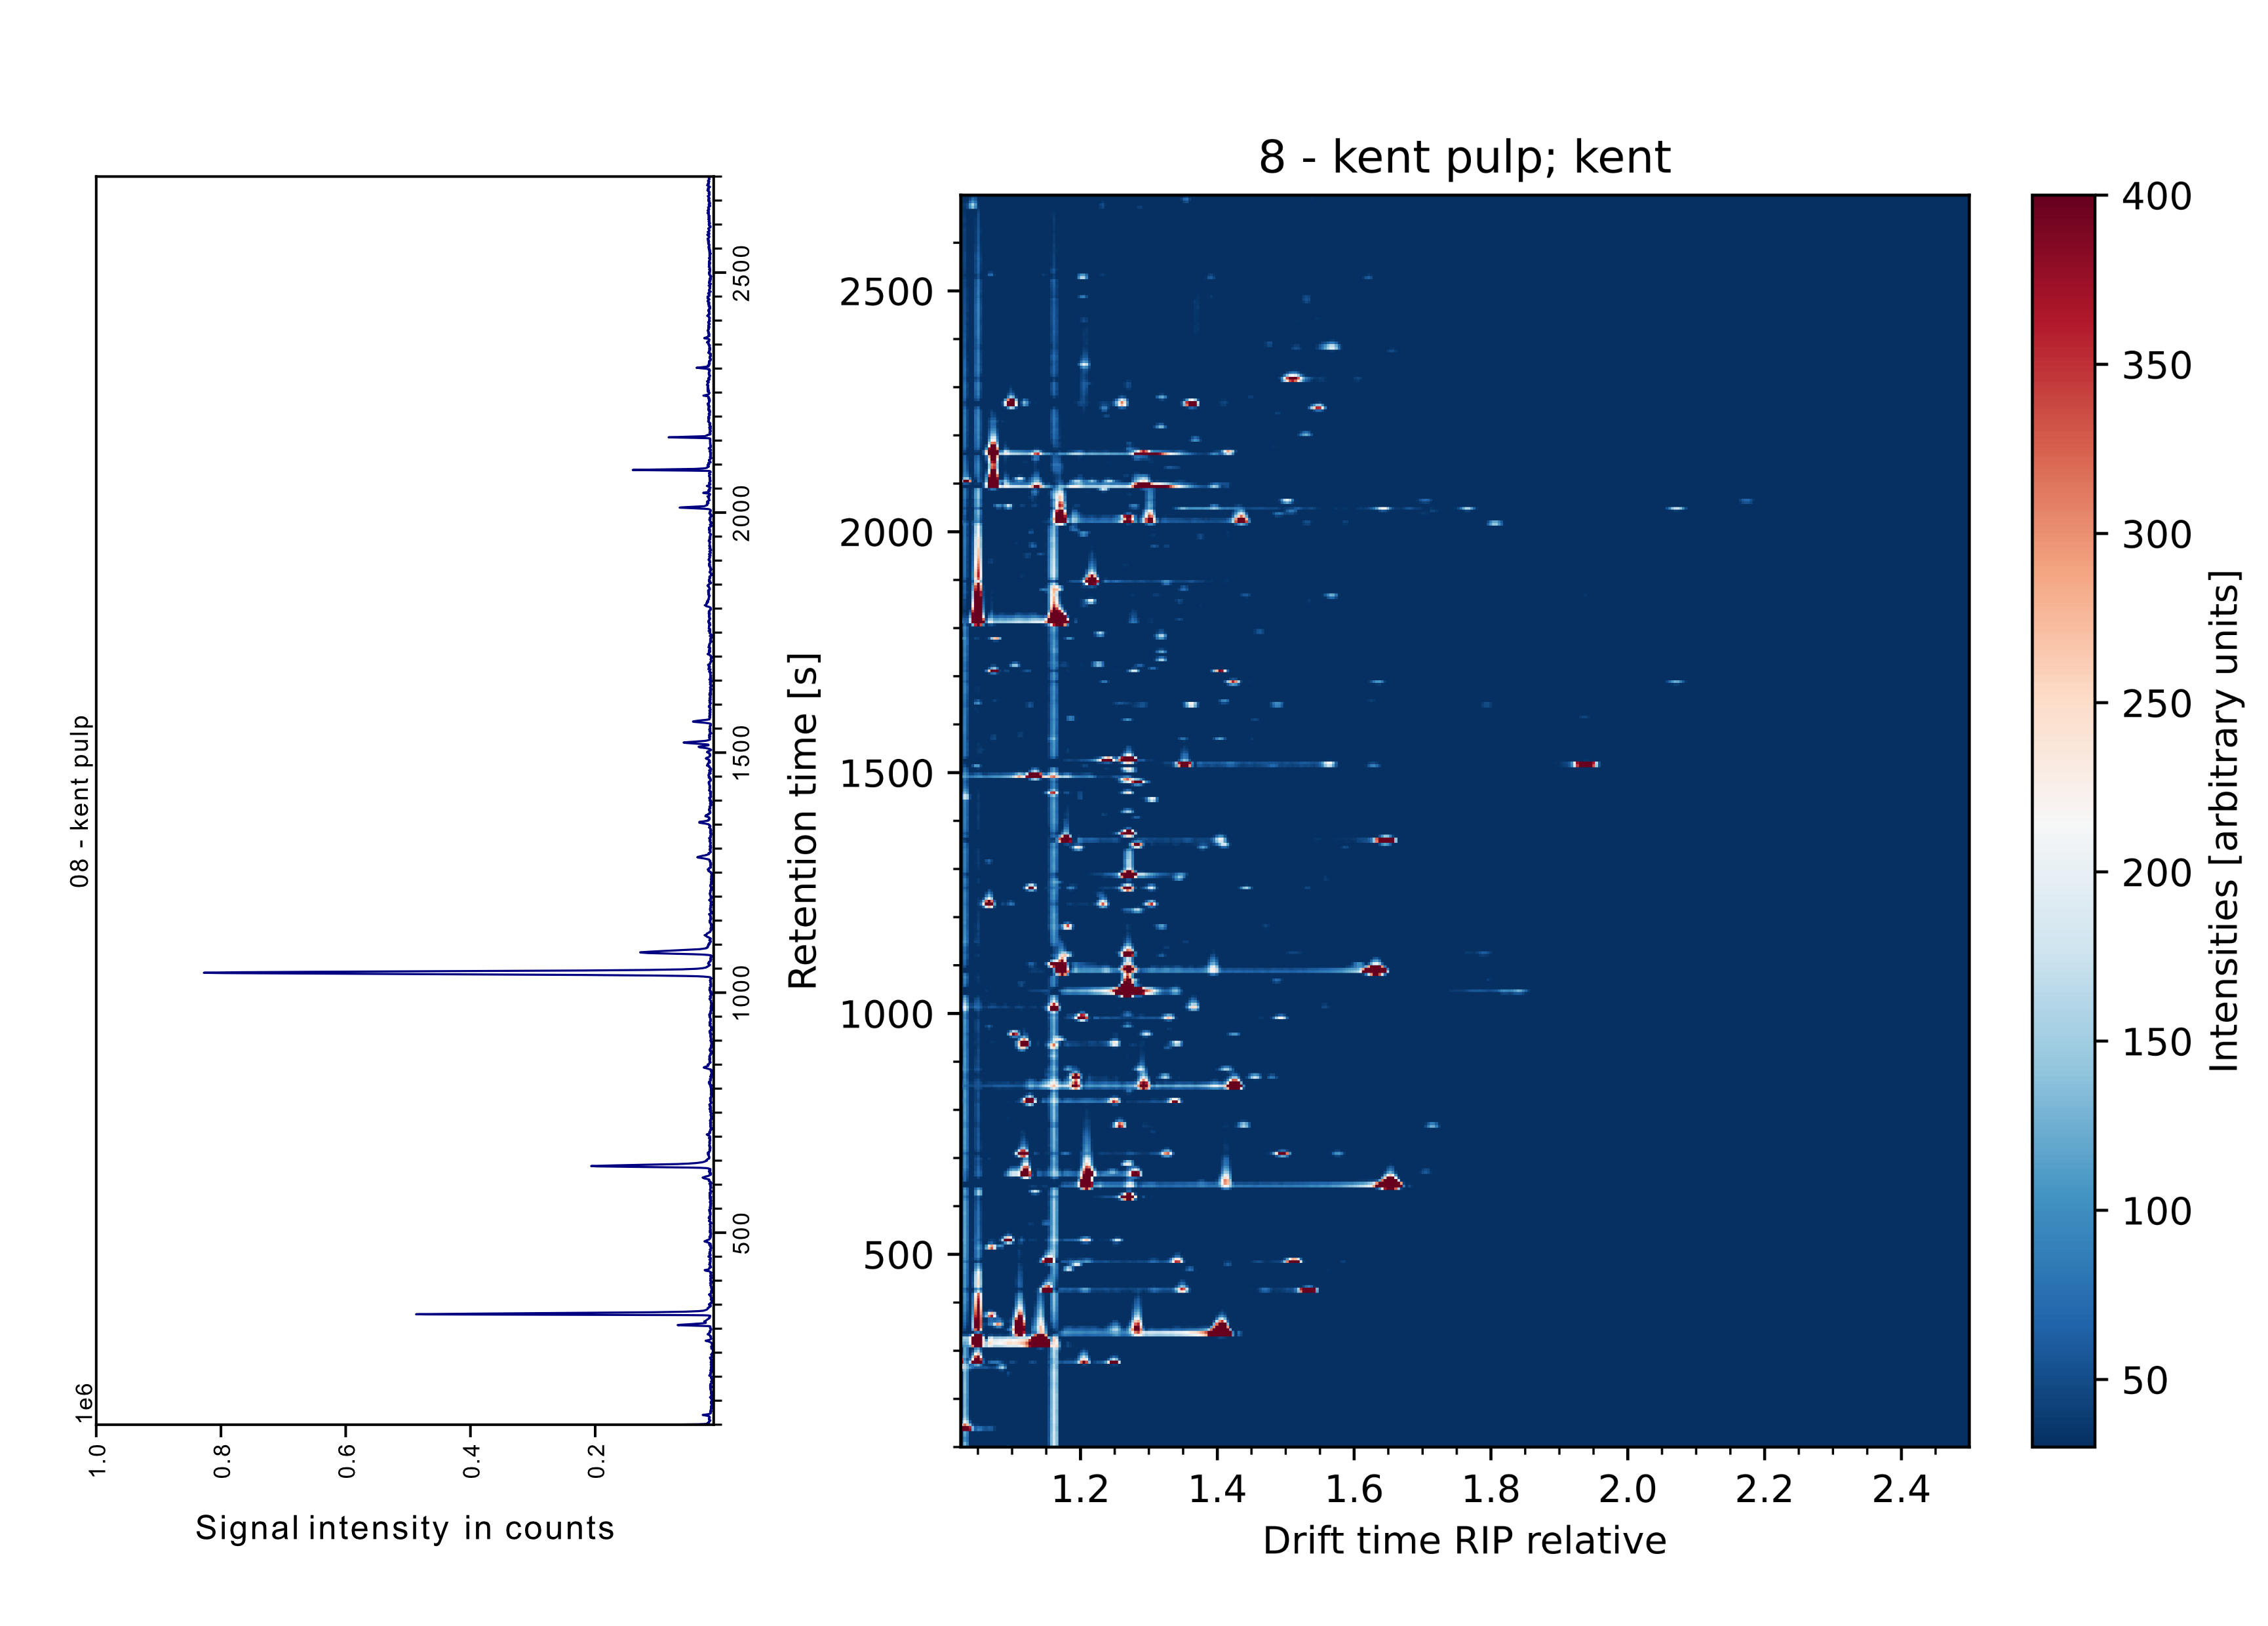
**

**(a) (b)**

**Figure S2.** Exemplaryvisualization of a ‘Kent’ mango sample and the simultaneous sample data of MS (**a**) and IMS (**b**).

**
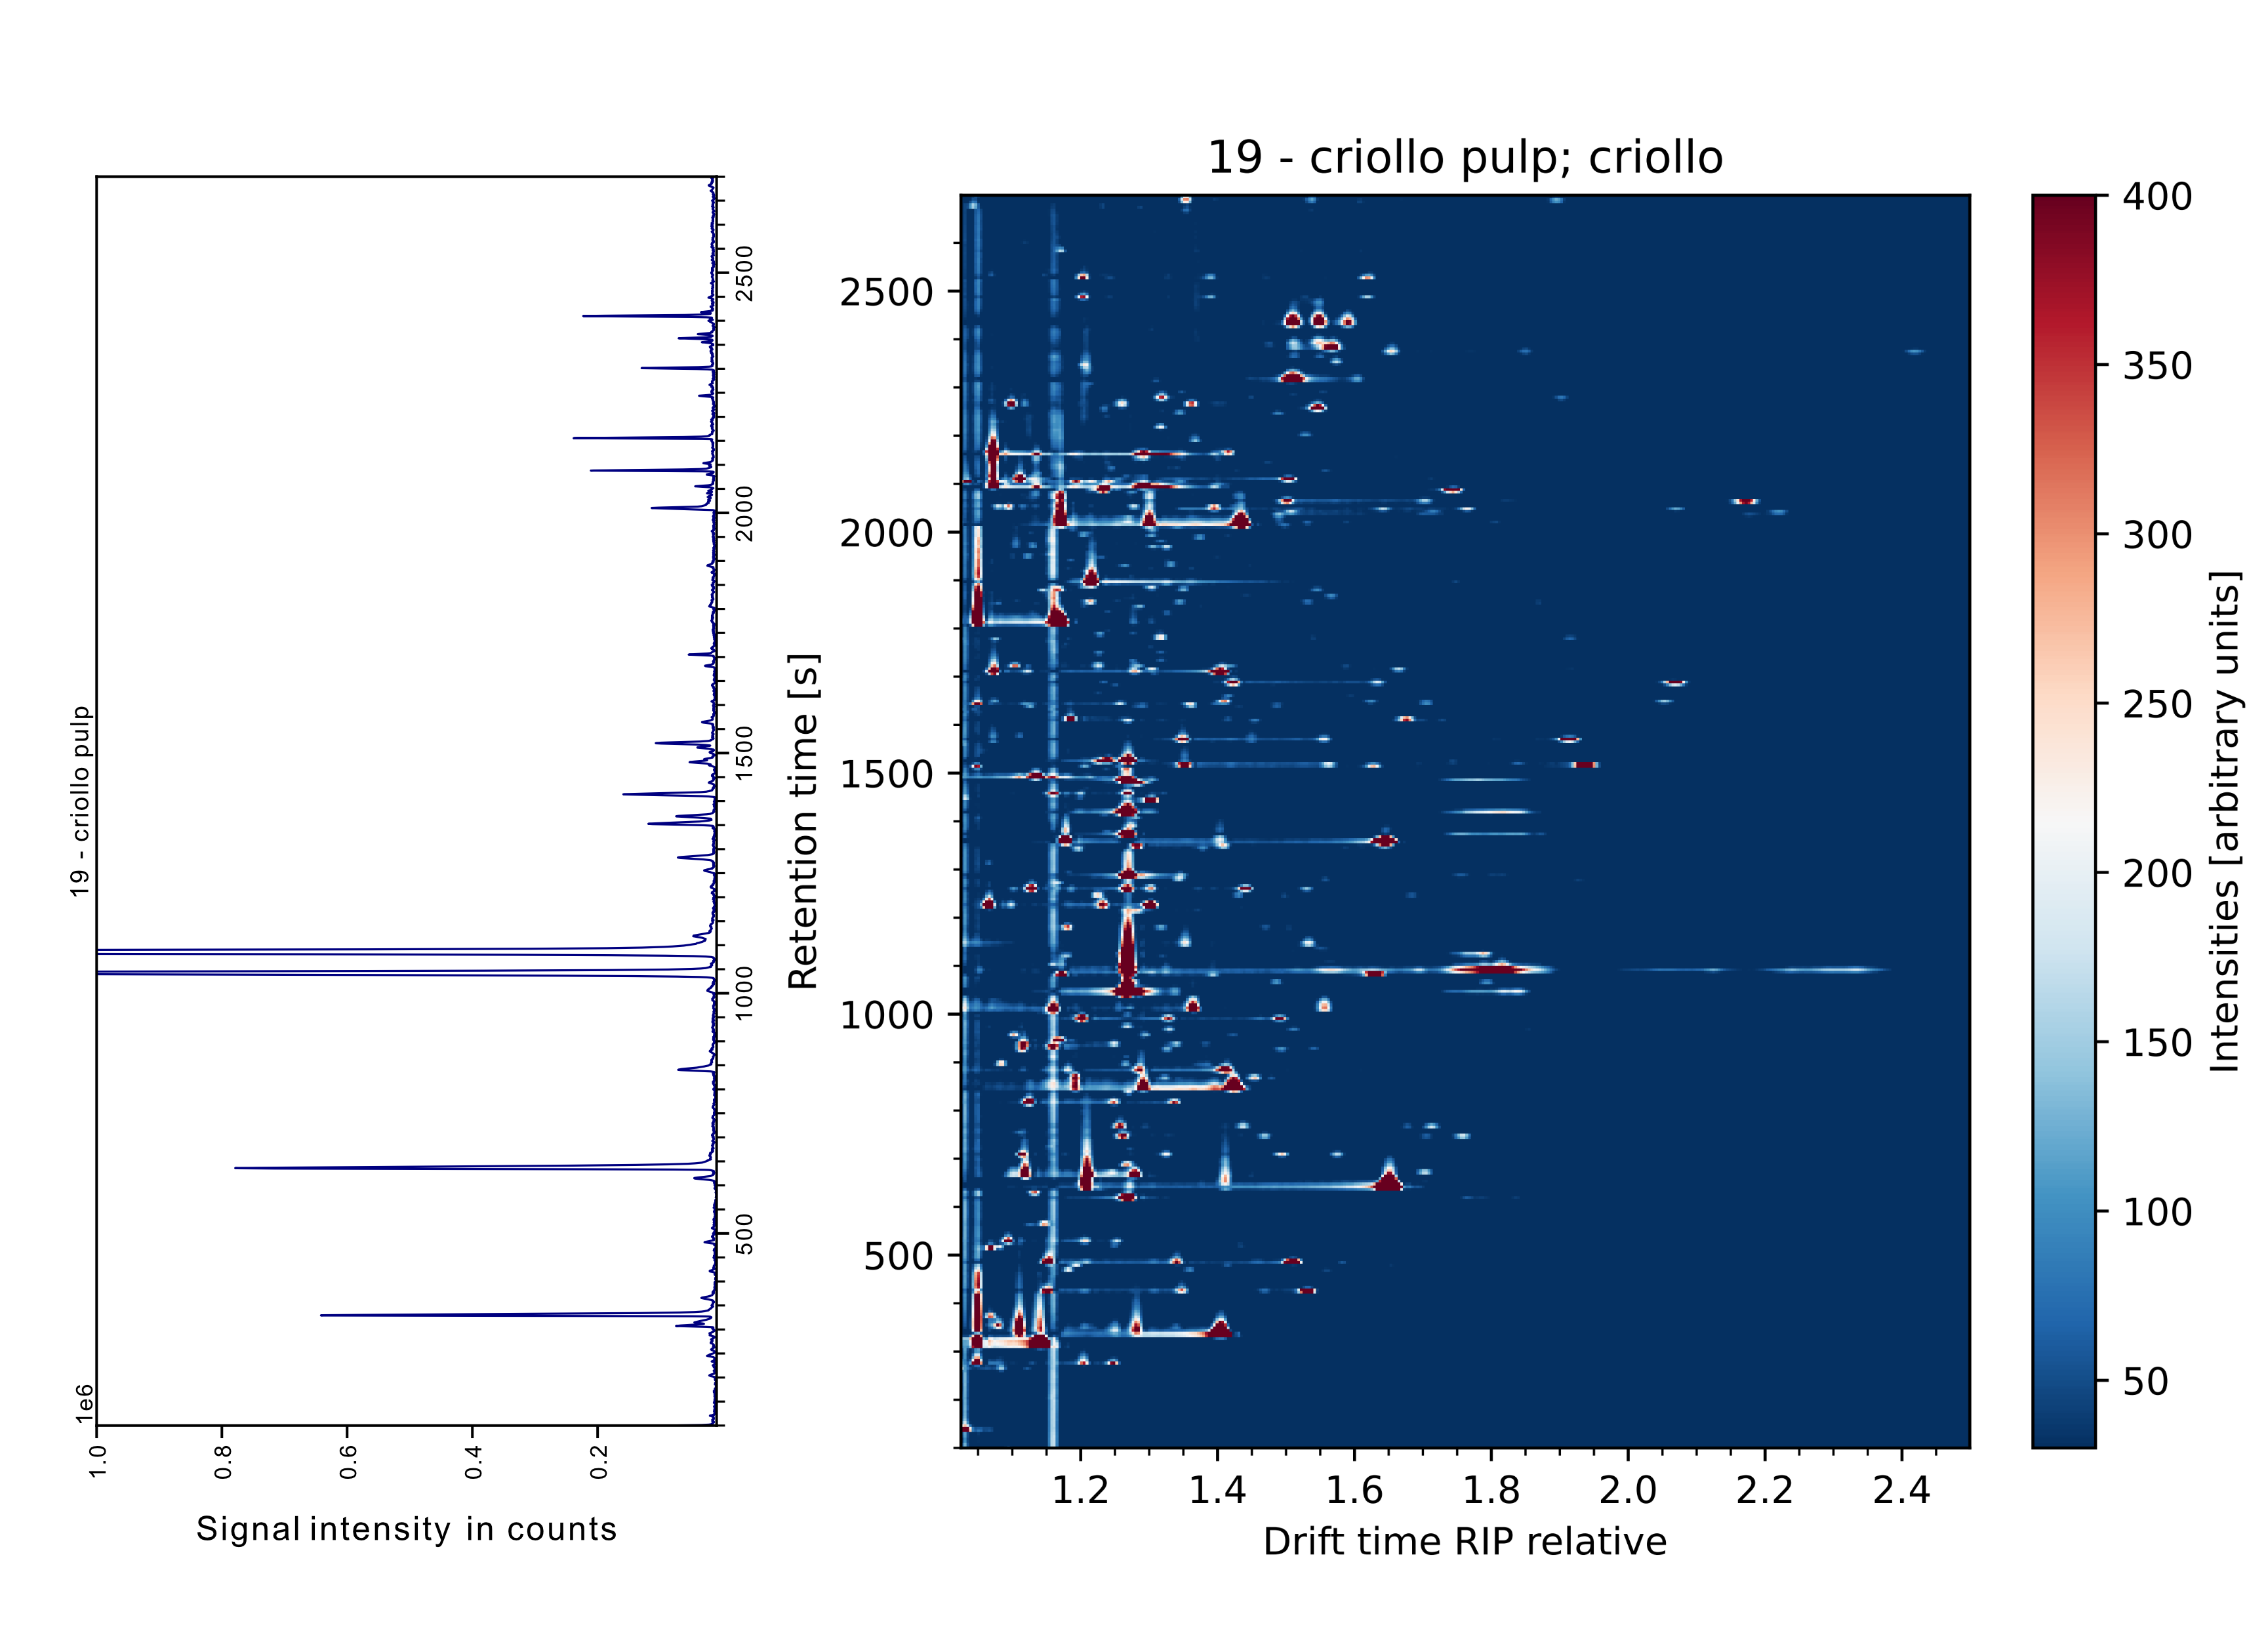
**

**(a) (b)**

**Figure S3.** Exemplaryvisualization of a ‘Criollo’ mango sample and the simultaneous sample data of MS (**a**) and IMS (**b**).

**
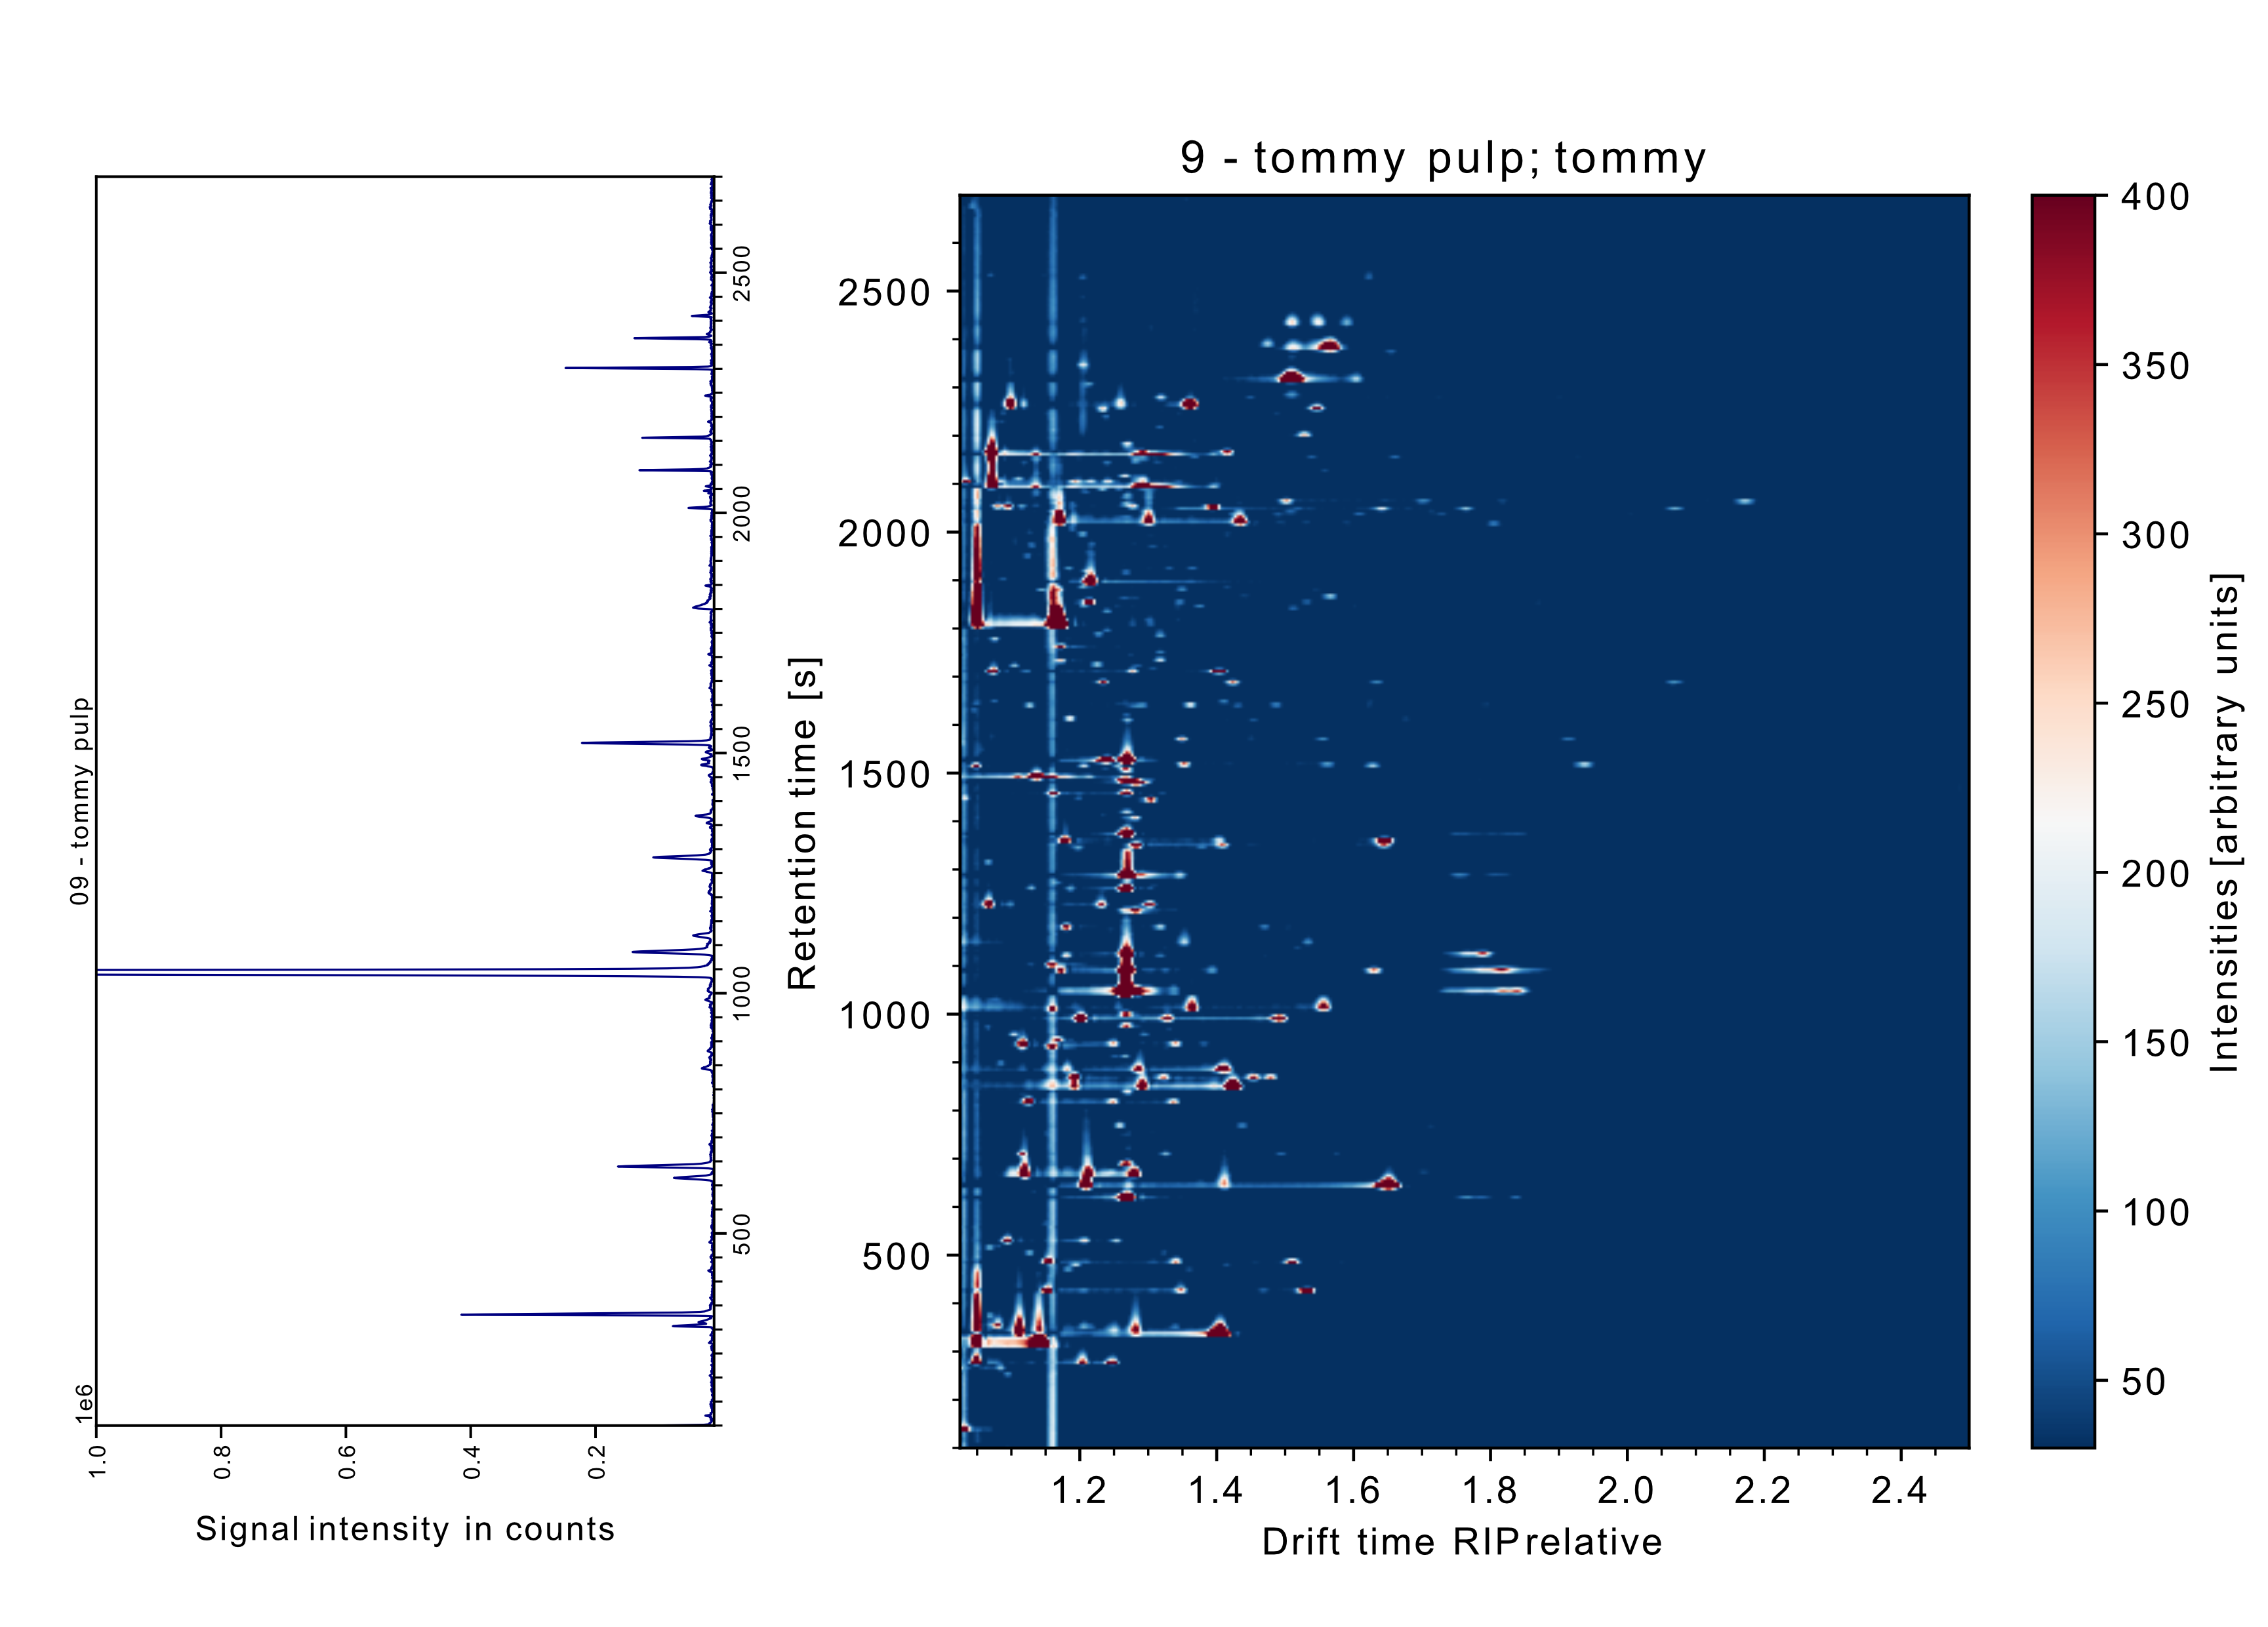
**

**Figure S4.** Exemplaryvisualization of a ‘Tommy’ mango sample and the simultaneous sample data of MS (**a**) and IMS (**b**)


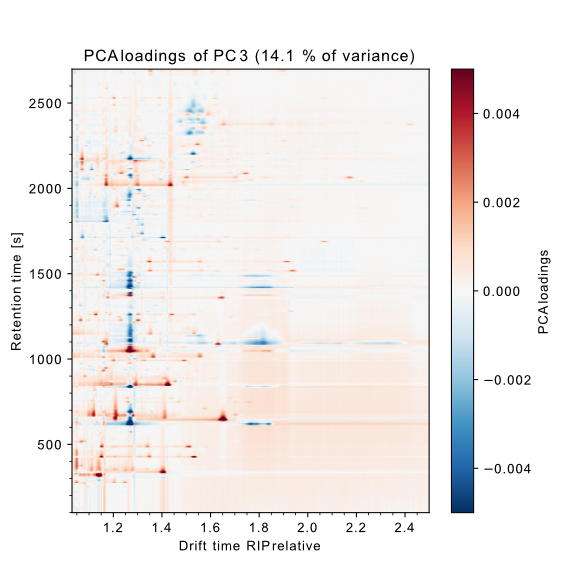


**Figure S5.** PCA loadings of PC3
